# Supplementary material for: Hibernation Patterns of the European Hedgehog, Erinaceus europaeus, at a Cornish Rescue Centre
Source: MDPI journal article supplement (doi:10.3390/ani10081418), 2020-08-14
Supplement: s1 [file s1]

**Supplementary material 1.**

Husbandry records and changes in body-weight for hedgehogs studied at Prickles and Paws rescue centre during the winters of 2015-16 and 2016-17. The sets of hibernatory weights are intentionally

| Year    | ID     | Sex    | Life stage on admission | Admitted   | Admittance weight (g) | Reason for admission                     | Parasitic burden                                       | Treatments administered    | Hibernated | # Days captive before hibernation | Pre-hibernation weight (g) | Mid-hibernation weight (g)                                   | End-hibernation weight (g) | Weight-loss (g) | Final arousal | Total hibernation period (nights) | # Spontaneous arousals | Mean duration of spontaneous arousals (nights) | Release weight (g) |
|---------|--------|--------|-------------------------|------------|-----------------------|------------------------------------------|--------------------------------------------------------|----------------------------|------------|-----------------------------------|----------------------------|--------------------------------------------------------------|----------------------------|-----------------|---------------|-----------------------------------|------------------------|------------------------------------------------|--------------------|
| 2015-16 | 227/15 | Male   | Juvenile                | 05/10/2015 | 177                   | Out in day, very underweight             | None                                                   | None                       | 17/12/2015 | 73                                | 691                        | 590 (30/01/16)<br>571 (27/02/16)                             | 524                        | 167             | 05/04/2016    | 110                               | 2                      | 1                                              | 759                |
| 2015-16 | 286/15 | Female | Juvenile                | 27/10/2015 | 318                   | Trapped in chicken coop for unknown time | <i>Crenosoma striatum</i> , + 3 ticks                  | Levacide, Baytril          | 07/01/2016 | 72                                | 776                        | -                                                            | 887                        | -111            | 25/01/2016    | 18                                | 3                      | 2.67                                           | 921                |
| 2015-16 | 272/15 | Female | Juvenile                | 18/10/2015 | 281                   | RTA, old injuries partially healed       | <i>Crenosoma striatum</i> , Fluke                      | Levacide, Profender        | 05/01/2016 | 79                                | 774                        | -                                                            | 774                        | 0               | 01/02/2016    | 27                                | 6                      | 2.5                                            | 775                |
| 2015-16 | 292/15 | Female | Juvenile                | 01/11/2015 | 290                   | Trapped in a pit                         | <i>Capillaria</i> spp., 3 ticks                        | Ivomec, Baytril            | 27/12/2015 | 56                                | 697                        | 622 (30/01/16)<br>597 (22/02/16)                             | 582                        | 115             | 01/04/2016    | 96                                | 15                     | 1.67                                           | 580                |
| 2015-16 | 320/15 | Female | Juvenile                | 15/11/2015 | 336                   | Out in day                               | <i>Crenosoma striatum</i> , <i>Capillaria</i> spp., +9 | Levacide, Ivomec           | 23/12/2015 | 38                                | 591                        | -                                                            | 480                        | 111             | 30/01/2016    | 38                                | 6                      | 1.67                                           | 623                |
| 2015-16 | 256/15 | Male   | Juvenile                | 14/10/2015 | 262                   | Dog attack                               | <i>Capillaria</i> spp.                                 | Ivomec, Baytril            | 12/12/2015 | 59                                | 657                        | 542 (30/01/16)                                               | 495                        | 162             | 01/04/2016    | 111                               | 5                      | 1                                              | 685                |
| 2015-16 | 280/15 | Female | Hoglet                  | 22/10/2015 | 207                   | Out in day, shallow wounds               | None                                                   | Synulox                    | 03/01/2016 | 73                                | 552                        | -                                                            | 487                        | 65              | 01/02/2016    | 29                                | 1                      | 3                                              | 594                |
| 2015-16 | 212/15 | Female | Juvenile                | 27/09/2015 | 276                   | Out in day, flystrike, wounds            | <i>Crenosoma striatum</i>                              | Levacide, Baytril, Loxicom | 21/12/2015 | 85                                | 867                        | 810 (10/01/16)* weighed early as aroused and active in hutch | 760                        | 107             | 06/02/2016    | 47                                | 9                      | 1.44                                           | 878                |
| 2015-16 | 235/15 | Female | Hoglet                  | 07/10/2015 | 107                   | Out in day, very hypothermic             | None                                                   | Baytril                    | 07/01/2016 | 92                                | 585                        | -                                                            | 518                        | 67              | 01/02/2016    | 25                                | 1                      | 1                                              | 616                |
| 2015-16 | 288/15 | Male   | Juvenile                | 29/10/2015 | 257                   | Out in day                               | <i>Crenosoma striatum</i> , + 2 ticks                  | Levacide                   | 23/12/2015 | 55                                | 633                        | -                                                            | 521                        | 112             | 31/01/2016    | 39                                | 4                      | 2.25                                           | 808                |
| 2015-16 | 255/15 | Male   | Hoglet                  | 13/10/2015 | 157                   | Out in day                               | <i>Crenosoma striatum</i>                              | Levacide                   | 10/01/2016 | 89                                | 725                        | -                                                            | 738                        | -13             | 23/01/2016    | 13                                | 2                      | 2                                              | 920                |
| 2015-16 | 336/20 | Male   | Juvenile                | 27/11/2015 | 271                   | Out in day                               | <i>Crenosoma striatum</i>                              | Baytril, Levacide          | 07/01/2016 | 41                                | 717                        | -                                                            | 737                        | -20             | 06/02/2016    | 30                                | 3                      | 1.67                                           | 980                |
| 2015-16 | 308/20 | Male   | Juvenile                | 09/11/2015 | 273                   | Out in day, very underweight             | <i>Crenosoma striatum</i>                              | Levacide                   | 20/12/2015 | 41                                | 729                        | 674 (30/01/16)                                               | 615                        | 114             | 02/04/2016    | 104                               | 10                     | 1.1                                            | 708                |
| 2015-16 | 223/15 | Female | Hoglet                  | 03/10/2015 | 104                   | Out in day, no sign of mum               | <i>Crenosoma striatum</i>                              | Levacide                   | 17/12/2015 | 75                                | 631                        | -                                                            | 493                        | 138             | 30/01/2016    | 44                                | 1                      | 1                                              | 672                |
| 2015-16 | 224/15 | Male   | Hoglet                  | 04/10/2015 | 114                   | Out in day                               | <i>Crenosoma striatum</i> , <i>Capillaria</i> spp.     | Levacide, Ivomec, Baytril  | 05/01/2016 | 93                                | 884                        | 805 (10/02/16)                                               | 734                        | 150             | 05/04/2016    | 91                                | 4                      | 1                                              | 704                |
| 2015-16 | 152/15 | Male   | Hoglet                  | 27/08/2015 | 77                    | Out in day, no sign of mum               | None                                                   | None                       | 10/11/2016 | 441                               | 555                        | -                                                            | 488                        | 67              | 29/11/2016    | 19                                | 1                      | 1                                              | 697                |
| 2015-16 | 296/15 | Male   | Juvenile                | 02/11/2015 | 331                   | Out in day                               | <i>Capillaria</i> spp. +1 tick                         | Ivomec                     | 06/01/2016 | 65                                | 884                        | 945 (02/02/16)                                               | 970                        | -86             | 22/02/2016    | 47                                | 5                      | 3.8                                            | 981                |
| 2015-16 | 271/15 | Male   | Juvenile                | 18/10/2015 | 185                   | Out in day, underweight                  | <i>Crenosoma striatum</i> , Fluke                      | Levacide, Profender        | 06/01/2016 | 80                                | 677                        | -                                                            | 625                        | 52              | 26/01/2016    | 20                                | 6                      | 1.17                                           | 781                |
| 2015-16 | 317/20 | Male   | Juvenile                | 13/11/2015 | 226                   | RSPCA, no history provided               | <i>Crenosoma striatum</i> , +8 ticks                   | Levacide                   | 06/01/2016 | 54                                | 713                        | 618 (6/02/16)                                                | 604                        | 109             | 05/04/2016    | 90                                | 11                     | 1.09                                           | 755                |
| 2015-16 | 175/15 | Male   | Juvenile                | 08/09/2015 | 195                   | Out in day, underweight, severe ringworm | None                                                   | Baytril, Loxicom, Ivomec   | 20/12/2016 | 469                               | 844                        | 752 (14/02/16)                                               | 770                        | 74              | 23/02/2017    | 65                                | 4                      | 1.5                                            | 741                |
| 2015-16 | 264/15 | Female | Hoglet                  | 17/10/2015 | 141                   | Out in day                               | <i>Crenosoma striatum</i> , <i>Capillaria</i> spp.     | Baytril, Ivomec, Levacide  | 06/01/2016 | 81                                | 661                        | -                                                            | 611                        | 50              | 24/01/2016    | 18                                | 3                      | 1.67                                           | 829                |

| Year    | ID     | Sex    | Life stage on admission | Admitted   | Admittance weight (g) | Reason for admission                               | Parasitic burden                                                 | Treatments administered   | Hibernated | # Days captive before hibernation | Pre-hibernation weight (g) | Mid-hibernation weight (g) | End-hibernation weight (g) | Weight-loss (g) | Final arousal | Total hibernation period (nights) | # Spontaneous arousals | Mean duration of spontaneous arousals (nights) | Release weight (g) |
|---------|--------|--------|-------------------------|------------|-----------------------|----------------------------------------------------|------------------------------------------------------------------|---------------------------|------------|-----------------------------------|----------------------------|----------------------------|----------------------------|-----------------|---------------|-----------------------------------|------------------------|------------------------------------------------|--------------------|
| 2016-17 | 363/16 | Female | Juvenile                | 02/11/2016 | 214                   | Out in day                                         | None                                                             | None                      | 13/01/2017 | 72                                | N/A                        | N/A                        | N/A                        | N/A             | 17/03/2017    | 63                                | 3                      | 1.666667                                       | 768                |
| 2016-17 | 350/16 | Male   | Juvenile                | 29/10/2016 | 201                   | Out in day                                         | <i>Crenosoma striatum</i> ,<br><i>Capillaria</i> spp.            | Levacide, Ivomec, Baytril | 27/01/2017 | 90                                | N/A                        | N/A                        | N/A                        | N/A             | 09/03/2017    | 41                                | 6                      | 4                                              | 968                |
| 2016-17 | 374/16 | Male   | Juvenile                | 06/11/2016 | 366                   | Severe ringworm                                    | <i>Capillaria</i> spp.                                           | Ivomec, Baytril, Imaverol | 09/01/2017 | 64                                | N/A                        | N/A                        | N/A                        | N/A             | 15/03/2017    | 65                                | 6                      | 2.333333                                       | 1028               |
| 2016-17 | 426/16 | Male   | Juvenile                | 30/11/2016 | 247                   | Out in day                                         | <i>Crenosoma striatum</i> ,<br><i>Capillaria</i> spp.            | Levacide, Ivomec, Baytril | 16/03/2017 | 106                               | N/A                        | N/A                        | N/A                        | N/A             | 05/04/2017    | 20                                | 4                      | 1                                              | 759                |
| 2016-17 | 370/16 | Female | Juvenile                | 04/11/2016 | 285                   | Very underweight                                   | <i>Crenosoma striatum</i> ,<br><i>Capillaria</i> spp.            | Levacide, Ivomec          | 15/01/2017 | 72                                | N/A                        | N/A                        | N/A                        | N/A             | 15/02/2017    | 31                                | 3                      | 4.666667                                       | 854                |
| 2016-17 | 390/16 | Male   | Juvenile                | 12/11/2016 | 273                   | From a vet. Hypothermic, no other history provided | <i>Crenosoma striatum</i> ,<br><i>Capillaria</i> spp.            | Levacide, Baytril         | 17/02/2017 | 97                                | N/A                        | N/A                        | N/A                        | N/A             | 03/04/2017    | 45                                | 5                      | 2.2                                            | 788                |
| 2016-17 | 427/16 | Female | Juvenile                | 30/11/2016 | 348                   | Out in day                                         | <i>Crenosoma striatum</i> ,<br><i>Capillaria</i> spp., + 1 tick  | Levacide, Ivomec          | 16/01/2017 | 47                                | N/A                        | N/A                        | N/A                        | N/A             | 20/03/2017    | 63                                | 2                      | 1.5                                            | 719                |
| 2016-17 | 324/16 | Male   | Juvenile                | 21/10/2016 | 224                   | Out in day                                         | <i>Crenosoma striatum</i> ,<br><i>Capillaria</i> spp., + 2 ticks | Levacide, Ivomec, Baytril | 29/01/2017 | 100                               | N/A                        | N/A                        | N/A                        | N/A             | 03/04/2017    | 64                                | 4                      | 2.75                                           | 793                |
| 2016-17 | 448/16 | Female | Juvenile                | 15/12/2016 | 315                   | Out in day                                         | <i>Capillaria</i> spp.                                           | Ivomec                    | 28/01/2017 | 44                                | N/A                        | N/A                        | N/A                        | N/A             | 21/03/2017    | 52                                | 4                      | 1.25                                           | 741                |
| 2016-17 | 397/16 | Female | Juvenile                | 15/11/2016 | 306                   | Small for time of year                             | None                                                             | None                      | 16/01/2017 | 62                                | N/A                        | N/A                        | N/A                        | N/A             | 21/01/2017    | 5                                 | 1                      | 0                                              | 713                |
| 2016-17 | 438/16 | Female | Juvenile                | 06/12/2016 | 370                   | Out in day                                         | <i>Capillaria</i> spp.                                           | Ivomec                    | 08/01/2017 | 33                                | N/A                        | N/A                        | N/A                        | N/A             | 18/03/2017    | 69                                | 2                      | 2                                              | 972                |
| 2016-17 | 333/16 | Male   | Hoglet                  | 23/10/2016 | 120                   | Admitted with very unwell mum                      | None                                                             | None                      | 22/01/2017 | 91                                | N/A                        | N/A                        | N/A                        | N/A             | 02/04/2017    | 70                                | 2                      | 1                                              | 660                |
| 2016-17 | 299/16 | Female | Hoglet                  | 08/10/2016 | 197                   | RSPCA no history provided                          | <i>Crenosoma striatum</i> ,<br><i>Capillaria</i> spp.            | Levacide, Ivomec          | 19/02/2017 | 134                               | N/A                        | N/A                        | N/A                        | N/A             | 19/03/2017    | 28                                | 4                      | 2                                              | 922                |
